# Supplementary material for: A modeling study of the nonlinear response of fine particles to air pollutant emissions in the Beijing–Tianjin–Hebei region
Source: Copernicus journal article supplement (doi:10.5194/acp-17-12031-2017), 2017-10-10
Supplement: Supplementary file 1 [file acp-17-12031-2017-supplement.pdf]

Supplement of Atmos. Chem. Phys., 17, 12031–12050, 2017  
<https://doi.org/10.5194/acp-17-12031-2017-supplement>  
© Author(s) 2017. This work is distributed under  
the Creative Commons Attribution 3.0 License.

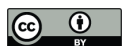

*Supplement of*

## **A modeling study of the nonlinear response of fine particles to air pollutant emissions in the Beijing–Tianjin–Hebei region**

**Bin Zhao et al.**

*Correspondence to:* Shuxiao Wang (shxwang@tsinghua.edu.cn)

The copyright of individual parts of the supplement might differ from the CC BY 3.0 License.

## 1 **S1 Evaluation of CMAQ/2D-VBS simulations**

2 The meteorological prediction lays the foundation for air quality simulation. In this study, the  
3 meteorological parameters simulated by WRFv3.7 are compared with the observational data  
4 obtained from the National Climatic Data Center (NCDC), where hourly or 3-h observations  
5 are available for 28 sites distributed within the inner domain. Due to the limited observational  
6 data available, the statistical evaluation was restricted to the temperature at 2 m, wind speed  
7 and wind direction at 10 m, and humidity at 2 m. The statistical indices used include the bias,  
8 gross error (GE), root mean square error (RMSE), systematic RMSE (Sys RMSE),  
9 unsystematic RMSE (Unsys RMSE), and index of agreement (IOA). A detailed explanation  
10 of these indices can be found in Baker (2004).

11 Table S3 lists the model performance statistics and the benchmarks suggested by Emery et  
12 al. (2001). These benchmark values were derived based on performance statistics of the Fifth-  
13 Generation NCAR/Penn State Mesoscale Model (MM5) from a number of studies over the  
14 U.S. domain (mostly at grid resolution of 12km or 4km), and have been widely accepted in  
15 many regional air quality modeling studies. We expect these standards should also be  
16 applicable to our simulation domain. For wind speed, wind direction, and temperature, all  
17 statistical indices are within the benchmark range. For humidity, the GE for the July  
18 simulation slightly exceeds this benchmark (2.2 g/kg vs 2.0 g/kg) which might be due to the  
19 high humidity in summer, while all other statistical indices are within the benchmarks,  
20 indicating an acceptable performance. In summary, these statistics indicate an overall decent  
21 performance of meteorological predictions.

22 During the simulation period, the Ministry of Environmental Protection of China (MEP)  
23 has been publishing hourly PM<sub>2.5</sub> concentrations for 138 state-controlled observatioanl sites in  
24 the inner domain on its official website (<http://datacenter.mep.gov.cn>). We compare simulated  
25 monthly mean PM<sub>2.5</sub> concentrations with these observations, and employ a number of  
26 statistical indices including mean observation, mean simulation, normalized mean bias  
27 (NMB), normalized mean error (NME), mean fractional bias (MFB), and mean fractional  
28 error (MFE) to give a quantitative assessment of the model performance, as shown in Table  
29 S4. The definitions of these indices have been documented in previous papers (Wang et al.,  
30 2010; Boylan and Russell, 2006). It can be seen that the PM<sub>2.5</sub> concentrations are slightly  
31 underestimated in all months, with NMBs ranging between -24.8% and -2.6%, probably  
32 attributable to the exclusion of fugitive dust emissions. Boylan and Russell (2006) proposed  
33 that a model performance goal (the level of accuracy that is considered to be close to the best

1 a model can be expected to achieve) was met if  $MFB \leq \pm 30\%$  and  $MFE \leq 50\%$ , and the model  
2 performance criteria (the level of accuracy that is considered to be acceptable for modeling  
3 applications) was met if  $MFB \leq \pm 60\%$  and  $MFE \leq 75\%$ . Table S4 shows that all the statistical  
4 indices meet the model performance goal, indicating a good modeling performance.

5 Having compared the monthly average  $PM_{2.5}$  concentrations, we continue to evaluate  
6 simulated temporal variation of  $PM_{2.5}$  concentrations. As described in Section 2.2 in the main  
7 text, we define 5 target regions for the development of the ERSM prediction system, i.e.,  
8 Beijing, Tianjin, Northern Hebei, Eastern Hebei, and Southern Hebei. We select one  
9 representative site in each target region, and compared the hourly  $PM_{2.5}$  simulations with  
10 observations, as shown in Figs. S1-S5. The figures show that the modeling system can capture  
11 the temporal variation of  $PM_{2.5}$  concentrations fairly well. The correlation coefficients range  
12 between 0.49 and 0.83 in January, March, and October, indicating good model performance.  
13 The correlation coefficients are relatively lower in July (0.21-0.49), in association with the  
14 relatively large discrepancies in meteorological simulations. Despite the lower correlation  
15 coefficients in July, the absolute errors are still acceptable considering the smaller  $PM_{2.5}$   
16 concentrations during summer.

17 Furthermore, we compare the simulated concentrations of major  $PM_{2.5}$  chemical  
18 components with observational data at 7 sites in the inner domain (unpublished data of  
19 Tsinghua University). The model performance statistics are summarized in Table S5.  $NO_3^-$   
20 concentrations are overestimated (NMB = 16.3%), while  $SO_4^{2-}$  concentrations are  
21 underestimated (NMB = -47.5%). There is a 25.1% underestimation in  $NH_4^+$  concentrations.  
22 The overestimation of  $NO_3^-$  and underestimation for  $SO_4^{2-}$  are consistent with previous studies  
23 over East Asia, probably attributed to the lack of some chemical formation pathways in the  
24 modeling system, such as  $SO_2$  heterogeneous reactions on the dust surface and the oxidation  
25 of  $SO_2$  by  $NO_2$  in aerosol water (Fu et al., 2016; Cheng et al., 2016; Wang et al., 2016).  
26 Elemental carbon (EC) concentrations are remarkably overestimated by 86.6%. EC  
27 concentrations are strongly affected by local emissions, while the spatial distribution of our  
28 emission inventory may not sufficiently capture local emission sources surrounding  
29 observational sites, leading to model-observation discrepancy. The overestimation may also  
30 be attributable to the absence of EC aging in CMAQ/2D-VBS, which leads to reduced  
31 fraction of hydrophilic EC and thus reduced wet deposition. Finally, concentrations of organic  
32 carbon (OC) are underestimated by 36.8%, although the CMAQ/2D-VBS model has been  
33 demonstrated to significantly reduce the underestimation in OC as compared to the default

1 CMAQ model (Zhao et al., 2016). Future studies are needed to further improve the OC  
2 simulation results. Similar to the evaluation of PM<sub>2.5</sub> simulations, we also adopt the  
3 benchmarks proposed by Boylan and Russell (2006). Since Boylan and Russell (2006)  
4 suggested that less abundant species would have less stringent performance goals and criteria  
5 than PM<sub>10</sub>/PM<sub>2.5</sub>, we just adopt the model performance criteria (MFB  $\leq \pm 60\%$  and MFE  $\leq$   
6 75%) described above. Table S5 shows that all the statistical indices meet the model  
7 performance criteria, indicating an overall decent model performance.

## 8 **S2 Selection of heavy-pollution episodes**

9 We collect hourly PM<sub>2.5</sub> concentrations at 138 state-controlled monitoring sites over the  
10 Beijing-Tianjin-Hebei (BTH) region during 2013-2015 from the Ministry of Environmental  
11 Protection (MEP) data center (<http://datacenter.mep.gov.cn/>). The daily-average PM<sub>2.5</sub>  
12 concentrations for each prefecture-level city are subsequently calculated. For any given day, it  
13 is regarded as a regional heavy-pollution day if over 75% prefecture-level cities have daily-  
14 average PM<sub>2.5</sub> concentrations larger than 75  $\mu\text{g}/\text{m}^3$ . If three or more continuous days are  
15 identified as heavy-pollution days, these days are treated as a regional heavy-pollution  
16 episode. In total, 47 regional heavy-pollution episodes are selected.

17 We subsequently employ the HYSPLIT model (Hybrid Single Particle Lagrangian  
18 Integrated Trajectory Model) to identify potential source regions of the heavy-pollution  
19 episodes. The HYSPLIT model provides the best-guess transport trajectory for an air parcel to  
20 arrive at a target location, based on meteorological data. It has been widely used in  
21 atmospheric studies including those conducted in the BTH region (Zhang et al., 2013; Jin et  
22 al., 2016; Yao et al., 2016). Since Beijing is located in the central part of the BTH region, we  
23 select Beijing urban center (39.95N, 116.43E) as the target location for the calculation of  
24 transport trajectory. It is noted, however, the calculated trajectories generally reflect the large-  
25 scale meteorological patterns which affects the air pollutant transport over the entire BTH  
26 region rather than just Beijing; this can be confirmed from the source attribution results  
27 during three typical episodes (Section 3.4 of the main text). For each heavy-pollution day and  
28 each of two heights (500 m and 1000 m), the trajectories are simulated at four time points, i.e.,  
29 0:00, 6:00, 12:00, and 18:00. Each trajectory is calculated for the last 72 hours at 1-h time  
30 resolution. The model is driven by meteorological fields obtained from NCEP GDAS (Global  
31 Data Assimilation System) at  $1^\circ \times 1^\circ$  resolution. While the HYSPLIT model can only  
32 calculate the transport trajectories, the Concentration Weighted Trajectory (CWT) method, an

1 improved back trajectory method, enables a quantitative estimation of the contribution from  
2 various source regions (Wang et al., 2015). On the basis of the HYSPLIT simulation results,  
3 we further use the CWT method to estimate the contribution of each source region to PM<sub>2.5</sub>  
4 concentrations at the target location.

5 Table S7 summarizes the potential source regions of the 47 heavy-pollution episodes. It is  
6 clear that the source regions with the highest occurrence frequencies are South (74.5%), Local  
7 (57.4%), Northwest (29.8%), Southeast (10.6%), West (8.5%), and North (4.3%). In this  
8 study, we selected (1) January 5-7, 2014, (2) October 7-11, 2014, and (3) October 29-31,  
9 2014 as representatives for the Local, South, and Southeast types. For the heavy-pollution  
10 episodes with major contribution from the Northwest, our back trajectory analysis indicate  
11 that the air mass usually originates from some desert regions. We do not include this type in  
12 our analysis because (1) such dust episodes dominated by coarse particles are different from  
13 the haze episodes this paper focuses on; (2) the ERSM prediction system developed in this  
14 study mainly covers the BTH region, and the long-range transport from the northwestern  
15 provinces is beyond the focus of this study.

## 16 17 18 **References**

- 19 Baker, K.: Meteorological Modeling Protocol for Application to PM<sub>2.5</sub>/Haze/Ozone  
20 Modeling Projects[R/OL]:  
21 [http://www.epa.state.oh.us/portals/27/SIP/Attain/D8\\_Meteorological\\_Modeling\\_Proto](http://www.epa.state.oh.us/portals/27/SIP/Attain/D8_Meteorological_Modeling_Protocol.pdf)  
22 [col.pdf](http://www.epa.state.oh.us/portals/27/SIP/Attain/D8_Meteorological_Modeling_Protocol.pdf), access: 2015-03-01, 2004.
- 23 Boylan, J. W., and Russell, A. G.: PM and light extinction model performance metrics, goals,  
24 and criteria for three-dimensional air quality models, *Atmos Environ*, 40, 4946-4959, DOI  
25 10.1016/j.atmosenv.2005.09.087, 2006.
- 26 Cheng, Y. F., Zheng, G. J., Wei, C., Mu, Q., Zheng, B., Wang, Z. B., Gao, M., Zhang, Q., He,  
27 K. B., Carmichael, G., Pöschl, U., and Su, H.: Reactive nitrogen chemistry in aerosol water  
28 as a source of sulfate during haze events in China, *Sci Adv*, 2, e1601530, DOI:  
29 10.1126/sciadv.1601530, 2016.
- 30 Emery, C., Tai, E., and Yarwood, G.: Enhanced meteorological modeling and performance  
31 evaluation for two Texas episodes. Report to the Texas Natural Resources Conservation  
32 Commission:  
33 [http://www.tceq.state.tx.us/assets/public/implementation/air/am/contracts/reports/mm](http://www.tceq.state.tx.us/assets/public/implementation/air/am/contracts/reports/mm/EnhancedMetModelingAndPerformanceEvaluation.pdf)  
34 [/EnhancedMetModelingAndPerformanceEvaluation.pdf](http://www.tceq.state.tx.us/assets/public/implementation/air/am/contracts/reports/mm/EnhancedMetModelingAndPerformanceEvaluation.pdf), access: 2015-03-01, 2001.
- 35 Fu, X., Wang, S. X., Chang, X., Cai, S. Y., Xing, J., and Hao, J. M.: Modeling analysis of  
36 secondary inorganic aerosols over China: pollution characteristics, and meteorological and  
37 dust impacts, *Sci Rep-Uk*, 6, 10.1038/srep35992, 2016.
- 38 Jin, X. C., Xiao, C. J., Li, J., Huang, D. H., Yuan, G. J., Yao, Y. G., Wang, X. H., Hua, L.,  
39 Zhang, G. Y., Cao, L., Wang, P. S., and Ni, B. F.: Source apportionment of PM<sub>2.5</sub> in

1 Beijing using positive matrix factorization, *Journal of Radioanalytical and Nuclear*  
2 *Chemistry*, 307, 2147-2154, 10.1007/s10967-015-4544-0, 2016.

3 Wang, G. H., Zhang, R. Y., Gomez, M. E., Yang, L. X., Zamora, M. L., Hu, M., Lin, Y., Peng,  
4 J. F., Guo, S., Meng, J. J., Li, J. J., Cheng, C. L., Hu, T. F., Ren, Y. Q., Wang, Y. S., Gao,  
5 J., Cao, J. J., An, Z. S., Zhou, W. J., Li, G. H., Wang, J. Y., Tian, P. F., Marrero-Ortiz, W.,  
6 Secrest, J., Du, Z. F., Zheng, J., Shang, D. J., Zeng, L. M., Shao, M., Wang, W. G., Huang,  
7 Y., Wang, Y., Zhu, Y. J., Li, Y. X., Hu, J. X., Pan, B., Cai, L., Cheng, Y. T., Ji, Y. M.,  
8 Zhang, F., Rosenfeld, D., Liss, P. S., Duce, R. A., Kolb, C. E., and Molina, M. J.: Persistent  
9 sulfate formation from London Fog to Chinese haze, *P Natl Acad Sci USA*, 113, 13630-  
10 13635, 10.1073/pnas.1616540113, 2016.

11 Wang, L. T., Jang, C., Zhang, Y., Wang, K., Zhang, Q. A., Streets, D., Fu, J., Lei, Y.,  
12 Schreifels, J., He, K. B., Hao, J. M., Lam, Y. F., Lin, J., Meskhidze, N., Voorhees, S.,  
13 Evarts, D., and Phillips, S.: Assessment of air quality benefits from national air pollution  
14 control policies in China. Part II: Evaluation of air quality predictions and air quality  
15 benefits assessment, *Atmos Environ*, 44, 3449-3457, DOI 10.1016/j.atmosenv.2010.05.058,  
16 2010.

17 Wang, Y., Wang, G. C., and Chen, L.: Transportation source and transportation process of  
18 PM10 and PM2.5 in seasons of Jinan, *Environ Sci Technol*, 38, 175-182, 2015.

19 Yao, L., Yang, L. X., Yuan, Q., Yan, C., Dong, C., Meng, C. P., Sui, X., Yang, F., Lu, Y. L.,  
20 and Wang, W. X.: Sources apportionment of PM2.5 in a background site in the North  
21 China Plain, *Sci Total Environ*, 541, 590-598, 10.1016/j.scitotenv.2015.09.123, 2016.

22 Zhang, R., Jing, J., Tao, J., Hsu, S. C., Wang, G., Cao, J., Lee, C. S. L., Zhu, L., Chen, Z.,  
23 Zhao, Y., and Shen, Z.: Chemical characterization and source apportionment of PM2.5 in  
24 Beijing: seasonal perspective, *Atmos Chem Phys*, 13, 7053-7074, 10.5194/acp-13-7053-  
25 2013, 2013.

26 Zhao, B., Wang, S. X., Donahue, N. M., Jathar, S. H., Huang, X. F., Wu, W. J., Hao, J. M.,  
27 and Robinson, A. L.: Quantifying the effect of organic aerosol aging and intermediate-  
28 volatility emissions on regional-scale aerosol pollution in China, *Sci Rep-Uk*, 6,  
29 10.1038/srep28815, 2016.

30  
31

1 **Tables and figures**

2 Table S1. Emissions of major air pollutants in prefecture-level cities over the BTH region in  
3 2014 (kt yr<sup>-1</sup>).

|              | NO <sub>x</sub> | SO <sub>2</sub> | NMVOC  | NH <sub>3</sub> | PM <sub>10</sub> | PM <sub>2.5</sub> | BC    | OC    |
|--------------|-----------------|-----------------|--------|-----------------|------------------|-------------------|-------|-------|
| Beijing      | 343.6           | 166.0           | 357.7  | 52.2            | 79.4             | 55.5              | 13.3  | 11.6  |
| Tianjin      | 344.6           | 240.3           | 338.0  | 45.4            | 148.2            | 111.6             | 16.3  | 25.8  |
| Shijiazhuang | 255.4           | 169.8           | 239.7  | 85.2            | 198.5            | 146.1             | 23.9  | 33.5  |
| Chengde      | 76.5            | 39.6            | 56.8   | 32.7            | 47.4             | 35.7              | 6.1   | 9.7   |
| Zhangjiakou  | 96.8            | 46.5            | 57.2   | 33.8            | 52.0             | 39.5              | 6.9   | 11.4  |
| Qinhuangdao  | 66.7            | 33.9            | 52.2   | 21.8            | 39.3             | 29.7              | 5.3   | 8.1   |
| Tangshan     | 247.9           | 125.8           | 186.0  | 66.1            | 129.3            | 96.2              | 15.3  | 24.1  |
| Langfang     | 80.5            | 60.8            | 104.7  | 33.8            | 84.9             | 62.7              | 10.5  | 14.4  |
| Baoding      | 165.0           | 107.1           | 201.5  | 87.0            | 151.4            | 115.4             | 20.4  | 32.3  |
| Cangzhou     | 144.1           | 102.6           | 170.0  | 66.0            | 144.7            | 107.0             | 17.3  | 24.6  |
| Hengshui     | 78.4            | 56.3            | 93.1   | 49.1            | 81.3             | 60.8              | 9.8   | 14.9  |
| Xingtai      | 142.4           | 91.6            | 114.6  | 58.9            | 98.7             | 74.9              | 12.8  | 20.9  |
| Handan       | 198.4           | 102.2           | 148.9  | 80.0            | 112.3            | 86.0              | 14.9  | 25.5  |
| Total        | 2240.3          | 1342.4          | 2120.4 | 712.0           | 1367.5           | 1021.2            | 172.7 | 256.9 |

4

1 Table S2. Provincial emissions of major air pollutants in China in 2014 (kt yr<sup>-1</sup>).

|                | NO <sub>x</sub> | SO <sub>2</sub> | NMVOC | NH <sub>3</sub> | PM <sub>10</sub> | PM <sub>2.5</sub> | BC   | OC   |
|----------------|-----------------|-----------------|-------|-----------------|------------------|-------------------|------|------|
| Beijing        | 344             | 166             | 358   | 52              | 79               | 55                | 13   | 12   |
| Tianjin        | 345             | 240             | 338   | 45              | 148              | 112               | 16   | 26   |
| Hebei          | 1552            | 936             | 1425  | 627             | 1140             | 854               | 143  | 219  |
| Shanxi         | 934             | 979             | 692   | 197             | 789              | 578               | 127  | 146  |
| Inner Mongolia | 1146            | 1088            | 665   | 366             | 656              | 492               | 112  | 140  |
| Liaoning       | 1155            | 885             | 1099  | 382             | 641              | 477               | 68   | 130  |
| Jilin          | 656             | 369             | 502   | 272             | 479              | 360               | 52   | 105  |
| Heilongjiang   | 755             | 301             | 655   | 346             | 578              | 456               | 78   | 172  |
| Shanghai       | 353             | 528             | 725   | 41              | 141              | 96                | 10   | 9    |
| Jiangsu        | 1599            | 983             | 2085  | 462             | 977              | 707               | 80   | 168  |
| Zhejiang       | 1110            | 1138            | 1675  | 173             | 443              | 299               | 32   | 50   |
| Anhui          | 1176            | 591             | 1081  | 417             | 863              | 651               | 91   | 221  |
| Fujian         | 799             | 503             | 711   | 167             | 341              | 240               | 28   | 51   |
| Jiangxi        | 623             | 397             | 499   | 239             | 474              | 312               | 38   | 70   |
| Shandong       | 2717            | 2334            | 2529  | 790             | 1530             | 1120              | 164  | 258  |
| Henan          | 1932            | 1036            | 1480  | 954             | 1379             | 1004              | 130  | 232  |
| Hubei          | 1234            | 1201            | 982   | 435             | 877              | 628               | 110  | 171  |
| Hunan          | 952             | 839             | 828   | 483             | 792              | 562               | 91   | 151  |
| Guangdong      | 1685            | 1032            | 1683  | 365             | 686              | 478               | 56   | 115  |
| Guangxi        | 736             | 743             | 728   | 352             | 660              | 494               | 46   | 123  |
| Hainan         | 139             | 96              | 146   | 59              | 64               | 46                | 4    | 11   |
| Chongqing      | 551             | 998             | 418   | 175             | 352              | 253               | 38   | 71   |
| Sichuan        | 1172            | 1661            | 1282  | 786             | 876              | 671               | 98   | 254  |
| Guizhou        | 676             | 1062            | 380   | 249             | 565              | 431               | 87   | 137  |
| Yunnan         | 681             | 483             | 449   | 337             | 457              | 339               | 54   | 94   |
| Tibet          | 27              | 6               | 16    | 98              | 12               | 9                 | 1    | 3    |
| Shaanxi        | 749             | 748             | 585   | 211             | 527              | 396               | 79   | 127  |
| Gansu          | 405             | 286             | 286   | 165             | 307              | 235               | 36   | 69   |
| Qinghai        | 125             | 52              | 61    | 86              | 82               | 62                | 8    | 12   |
| Ningxia        | 210             | 215             | 100   | 40              | 135              | 96                | 14   | 16   |
| Xinjiang       | 886             | 861             | 405   | 248             | 400              | 296               | 47   | 78   |
| Total          | 27422           | 22754           | 24867 | 9621            | 17450            | 12812             | 1953 | 3441 |

2



1 Table S3. Performance statistics for meteorological variables.

| Variable       | Index      | Unit | Jan    | Mar    | Jul    | Oct    | Benchmark      |
|----------------|------------|------|--------|--------|--------|--------|----------------|
| Wind Speed     | Mean OBS   | m/s  | 2.68   | 2.95   | 2.53   | 2.40   |                |
|                | Mean SIM   | m/s  | 2.81   | 3.06   | 2.66   | 2.63   |                |
|                | Bias       | m/s  | 0.13   | 0.11   | 0.13   | 0.24   | $\leq \pm 0.5$ |
|                | GE         | m/s  | 1.23   | 1.25   | 1.19   | 1.11   | $\leq 2$       |
|                | RMSE       | m/s  | 1.86   | 1.76   | 1.6    | 1.58   | $\leq 2$       |
|                | Sys RMSE   | m/s  | 1.4    | 1.12   | 1.13   | 1.11   |                |
|                | Unsys RMSE | m/s  | 1.2    | 1.33   | 1.11   | 1.10   |                |
|                | IOA        |      | 0.67   | 0.73   | 0.65   | 0.71   | $\geq 0.6$     |
| Wind Direction | Mean OBS   | °    | 230.79 | 239.51 | 205.37 | 195.17 |                |
|                | Mean SIM   | °    | 249.28 | 220    | 201.04 | 195.10 |                |
|                | Bias       | °    | 2.99   | 0.49   | -3.45  | 2.76   | $\leq \pm 10$  |
| Temperature    | Mean OBS   | K    | 270.3  | 280.64 | 298.54 | 285.70 |                |
|                | Mean SIM   | K    | 270.03 | 280.33 | 298.54 | 285.92 |                |
|                | Bias       | K    | -0.27  | -0.3   | 0      | 0.21   | $\leq \pm 0.5$ |
|                | GE         | K    | 1.41   | 1.66   | 1.75   | 1.34   | $\leq 2$       |
|                | RMSE       | K    | 1.86   | 2.28   | 2.38   | 1.81   |                |
|                | Sys RMSE   | K    | 0.43   | 0.52   | 0.51   | 0.47   |                |
|                | Unsys RMSE | K    | 1.79   | 2.21   | 2.31   | 1.73   |                |
|                | IOA        |      | 0.97   | 0.97   | 0.94   | 0.97   | $\geq 0.8$     |
| Humidity       | Mean OBS   | g/kg | 1.54   | 2.83   | 14     | 6.02   |                |
|                | Mean SIM   | g/kg | 1.66   | 2.82   | 13.01  | 5.49   |                |
|                | Bias       | g/kg | 0.12   | -0.01  | -0.99  | -0.53  | $\leq \pm 1$   |
|                | GE         | g/kg | 0.32   | 0.58   | 2.2    | 1.01   | $\leq 2$       |
|                | RMSE       | g/kg | 0.47   | 0.81   | 2.8    | 1.38   |                |
|                | Sys RMSE   | g/kg | 0.23   | 0.44   | 1.76   | 0.92   |                |
|                | Unsys RMSE | g/kg | 0.4    | 0.67   | 2.12   | 0.96   |                |
|                | IOA        |      | 0.86   | 0.85   | 0.76   | 0.81   | $\geq 0.6$     |

2

1 Table S4. Statistical results for the comparison of PM<sub>2.5</sub> concentrations simulated by  
 2 CMAQ/2D-VBS with surface observations.

|                         | Jan   | Mar   | Jul  | Oct  | Model performance goal <sup>a</sup> | Model performance criteria <sup>a</sup> |
|-------------------------|-------|-------|------|------|-------------------------------------|-----------------------------------------|
| Data pairs <sup>b</sup> | 3751  | 3596  | 3627 | 4216 | -                                   | -                                       |
| NMB (%)                 | -24.8 | -21.3 | -4.2 | -2.6 | -                                   | -                                       |
| NME (%)                 | 27.7  | 24.8  | 19.3 | 25.0 | -                                   | -                                       |
| MFB (%)                 | -29.4 | -24.1 | -7.8 | -1.9 | ≤ ± 30                              | ≤ ± 60                                  |
| MFE (%)                 | 33.4  | 28.7  | 22.7 | 24.8 | ≤ 50                                | ≤ 75                                    |
| R                       | 0.64  | 0.73  | 0.64 | 0.58 | -                                   | -                                       |

3 <sup>a</sup> The model performance goals and criteria are adopted from Boylan and Russell (2006).

4 <sup>b</sup> The data used in the statistical analysis are daily PM<sub>2.5</sub> concentrations.

5

6 Table S5. Statistical results for the comparison of PM<sub>2.5</sub> chemical component concentrations  
 7 simulated by CMAQ/2D-VBS with observations at 7 surface sites over the BTH region.

|                         | NO <sub>3</sub> <sup>-</sup> | SO <sub>4</sub> <sup>2-</sup> | NH <sub>4</sub> <sup>+</sup> | OC    | EC    | Model performance criteria <sup>a</sup> |
|-------------------------|------------------------------|-------------------------------|------------------------------|-------|-------|-----------------------------------------|
| Data pairs <sup>b</sup> | 278                          | 278                           | 278                          | 273   | 271   | -                                       |
| NMB (%)                 | 16.3                         | -47.5                         | -25.1                        | -36.8 | 86.6  | -                                       |
| NME (%)                 | 67.7                         | 60.6                          | 56.9                         | 52.8  | 98.6  | -                                       |
| MFB (%)                 | -2.6                         | -51.3                         | -37.7                        | -48.4 | 57.2  | ≤ ± 60                                  |
| MFE (%)                 | 65.6                         | 76.4                          | 74.2                         | 71.2  | 67.3  | ≤ 75                                    |
| R                       | 0.681                        | 0.637                         | 0.638                        | 0.412 | 0.389 | -                                       |

8 <sup>a</sup> The model performance criteria are adopted from Boylan and Russell (2006).

9 <sup>b</sup> The data used in the statistical analysis are daily concentrations of PM<sub>2.5</sub> chemical components.

10

11 Table S6. Description of out-of-sample scenarios

| Case number | Description                                                                                                                                                                                                                                                                                                                                                                                                                              |
|-------------|------------------------------------------------------------------------------------------------------------------------------------------------------------------------------------------------------------------------------------------------------------------------------------------------------------------------------------------------------------------------------------------------------------------------------------------|
| 1-6         | Control variables of precursors in Beijing change but the other variables stay the same as the base case. For case 1-3, the emission ratios (defined as the ratios of the changed emissions to the emissions in the base case) of all control variables of precursors in Beijing are set to 0.1, 0.5, and 1.15, respectively. Case 4-6 are generated randomly by applying LHS method for the control variables of precursors in Beijing. |
| 7-12        | The same as case 1-6 but for Tianjin.                                                                                                                                                                                                                                                                                                                                                                                                    |
| 13-18       | The same as case 1-6 but for Northern Hebei.                                                                                                                                                                                                                                                                                                                                                                                             |
| 19-24       | The same as case 1-6 but for Eastern Hebei.                                                                                                                                                                                                                                                                                                                                                                                              |
| 25-30       | The same as case 1-6 but for Southern Hebei.                                                                                                                                                                                                                                                                                                                                                                                             |
| 31-40       | Control variables of precursors change randomly (with LHS method applied) but those of primary inorganic PM <sub>2.5</sub> stay the same as the base case.                                                                                                                                                                                                                                                                               |
| 41-44       | Control variables of primary inorganic PM <sub>2.5</sub> change randomly (with LHS method applied) but those of precursors stay the same as the base case.                                                                                                                                                                                                                                                                               |
| 45-54       | These cases are generated randomly by applying LHS method for all control variables.                                                                                                                                                                                                                                                                                                                                                     |

1 Table S7. Identification of potential source regions for 47 heavy-pollution episodes during  
 2 2013-2015 over the BTH region.

| NO. | Year | Period                       | Potential source region                                                               |
|-----|------|------------------------------|---------------------------------------------------------------------------------------|
| 1   | 2013 | January 18-23                | Local + Northwest (long distance)                                                     |
| 2   |      | January 26-31                | Local + South (short distance) + Southeast (short distance)                           |
| 3   |      | February 23-28               | South (short distance) + Northwest (long distance)                                    |
| 4   |      | March 5-8                    | South (short distance)                                                                |
| 5   |      | March 15-18                  | Local + South (short distance) + Northwest (long distance)                            |
| 6   |      | April 2-4                    | Local + South (medium distance) + Northwest (medium distance)                         |
| 7   |      | May 6-8                      | South (short distance) + South (medium distance)                                      |
| 8   |      | July 18-20                   | South (short distance)                                                                |
| 9   |      | September 17-19              | Local                                                                                 |
| 10  |      | September 27 to<br>October 1 | South (short distance)                                                                |
| 11  |      | October 4-7                  | South (short distance)                                                                |
| 12  |      | October 30 to<br>November 2  | Local + South (short distance) + South (medium distance)                              |
| 13  |      | November 21-24               | Local + Northwest (short distance) + Northwest (medium distance)                      |
| 14  |      | December 1-4                 | Local + Northwest (short distance) + North (short distance)                           |
| 15  |      | December 6-8                 | Local + South (short distance) + Southeast (short distance)                           |
| 16  |      | December 21-25               | Local + South (short distance)                                                        |
| 17  | 2014 | January 5-7                  | Local + South (short distance)                                                        |
| 18  |      | January 13-19                | Local + South (short distance)                                                        |
| 19  |      | January 22-24                | South (short distance)                                                                |
| 20  |      | February 11-16               | Local + South (short distance) + South (medium distance) + Southeast (short distance) |
| 21  |      | February 20-26               | South (short distance) + Southeast (short distance)                                   |
| 22  |      | March 8-11                   | Local + South (short distance)                                                        |
| 23  |      | March 23-28                  | South (medium distance)                                                               |
| 24  |      | March 31 to April 2          | Local + South (short distance) + South (medium distance)                              |
| 25  |      | April 7-9                    | South (medium distance)                                                               |
| 26  |      | April 12-14                  | South (short distance) + South (medium distance)                                      |
| 27  |      | April 23-25                  | South (short distance) + South (medium distance)                                      |
| 28  |      | October 7-11                 | South (short distance) + South (medium distance) + South (long distance)              |
| 29  |      | October 17-20                | South (short distance) + South (medium distance) + South (long distance)              |
| 30  |      | October 23-25                | Local + South (short distance) + South (medium distance) + Northwest (long distance)  |
| 31  |      | October 29-31                | South (short distance) + Southeast (short distance)                                   |
| 32  |      | November 19-21               | Local + South (short distance) + South (medium distance) + Northwest (long distance)  |
| 33  |      | December 26-29               | Local + South (medium distance) + West (medium distance) + Northwest (long distance)  |
| 34  | 2015 | January 3-5                  | Local + West (long distance)                                                          |

|    |                              |                                                     |
|----|------------------------------|-----------------------------------------------------|
| 35 | January 8-10                 | Local + Northwest (long distance)                   |
| 36 | January 14-16                | South (medium distance) + South (long distance)     |
| 37 | January 22-26                | Local + West (long distance)                        |
| 38 | February 19-21               | North (medium distance)、 South (long distance)      |
| 39 | March 6-8                    | Local + West (long distance)                        |
| 40 | March 15-17                  | Local + Northwest (long distance)                   |
| 41 | April 9-11                   | Local                                               |
| 42 | May 26-28                    | Local + South (medium distance)                     |
| 43 | October 14-17                | South (medium distance) + Northwest (long distance) |
| 44 | November 10-15               | Local + South (medium distance)                     |
| 45 | November 27 to<br>December 1 | South (medium distance) + Northwest (long distance) |
| 46 | December 7-10                | Local                                               |
| 47 | December 21-26               | Northwest (long distance)                           |

---

1

2

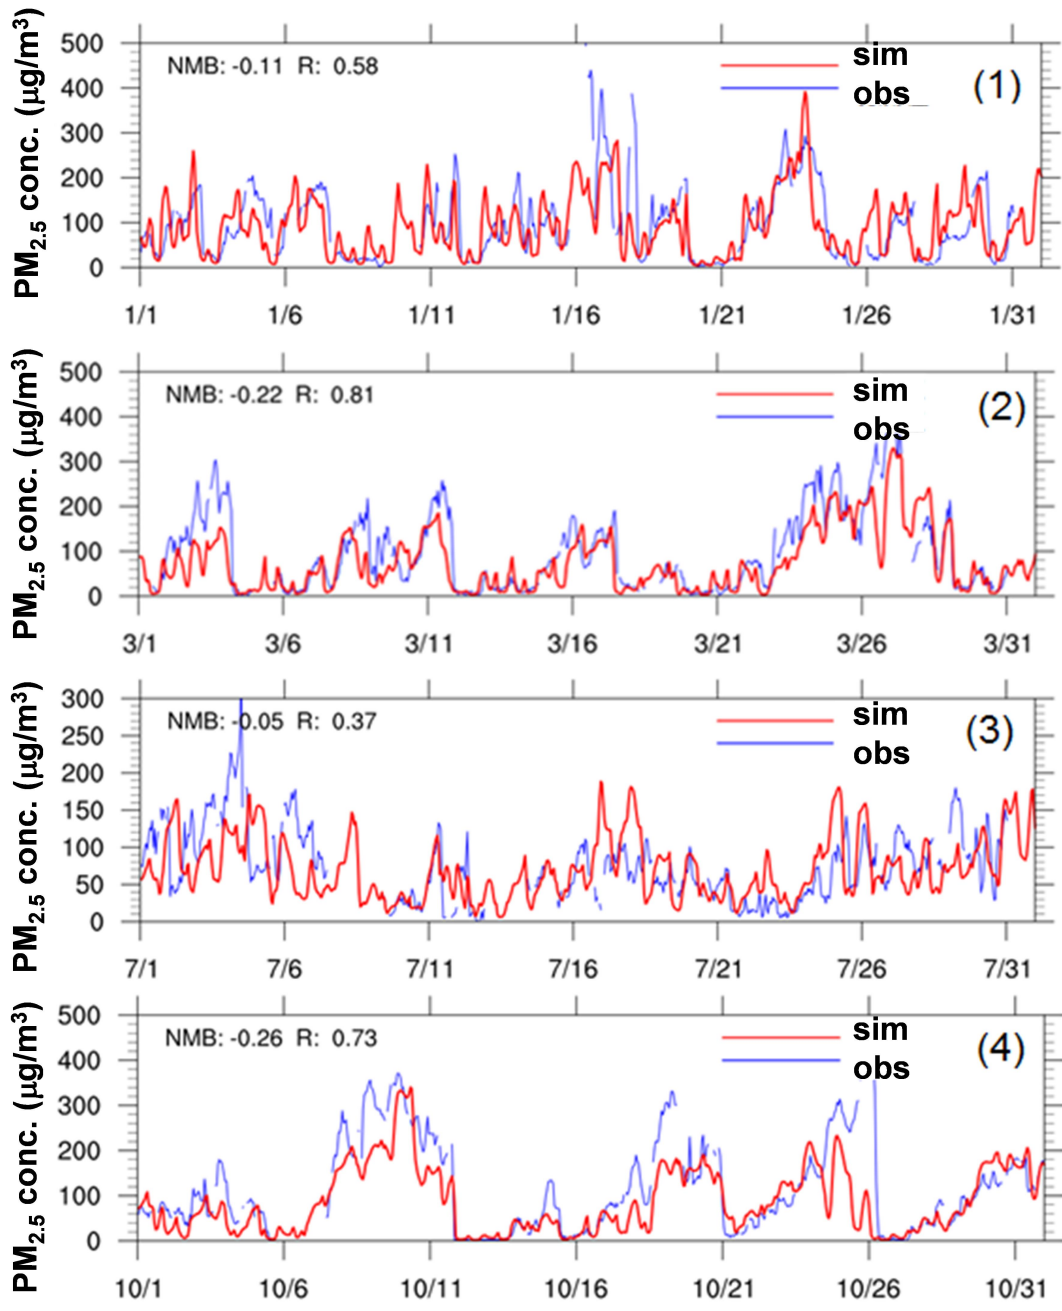

1  
2  
3  
4  
5  
6

Figure S1. Comparison of simulated and observed PM<sub>2.5</sub> concentrations at the Dongsi site in Beijing in (1) January, (2) March, (3) July, and (4) October. In July, the simulations and observations are for a nearby Langfang site because the observations at the Dongsi site are missing.

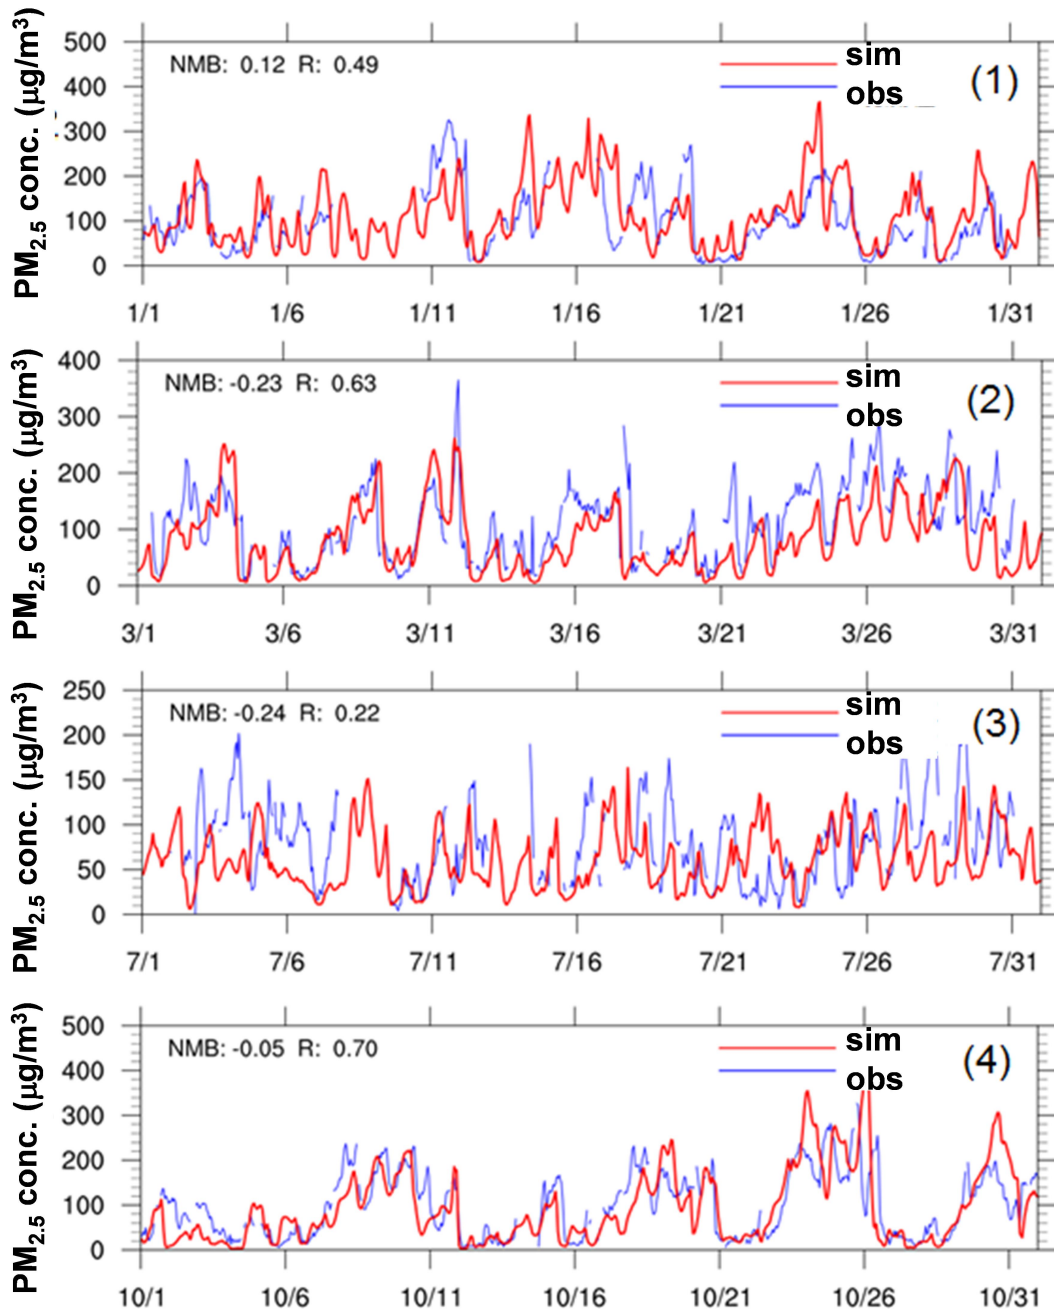

1

2 Figure S2. Comparison of simulated and observed PM<sub>2.5</sub> concentrations at the Tuanbowa site  
 3 in Tianjin in (1) January, (2) March, (3) July, and (4) October.

4

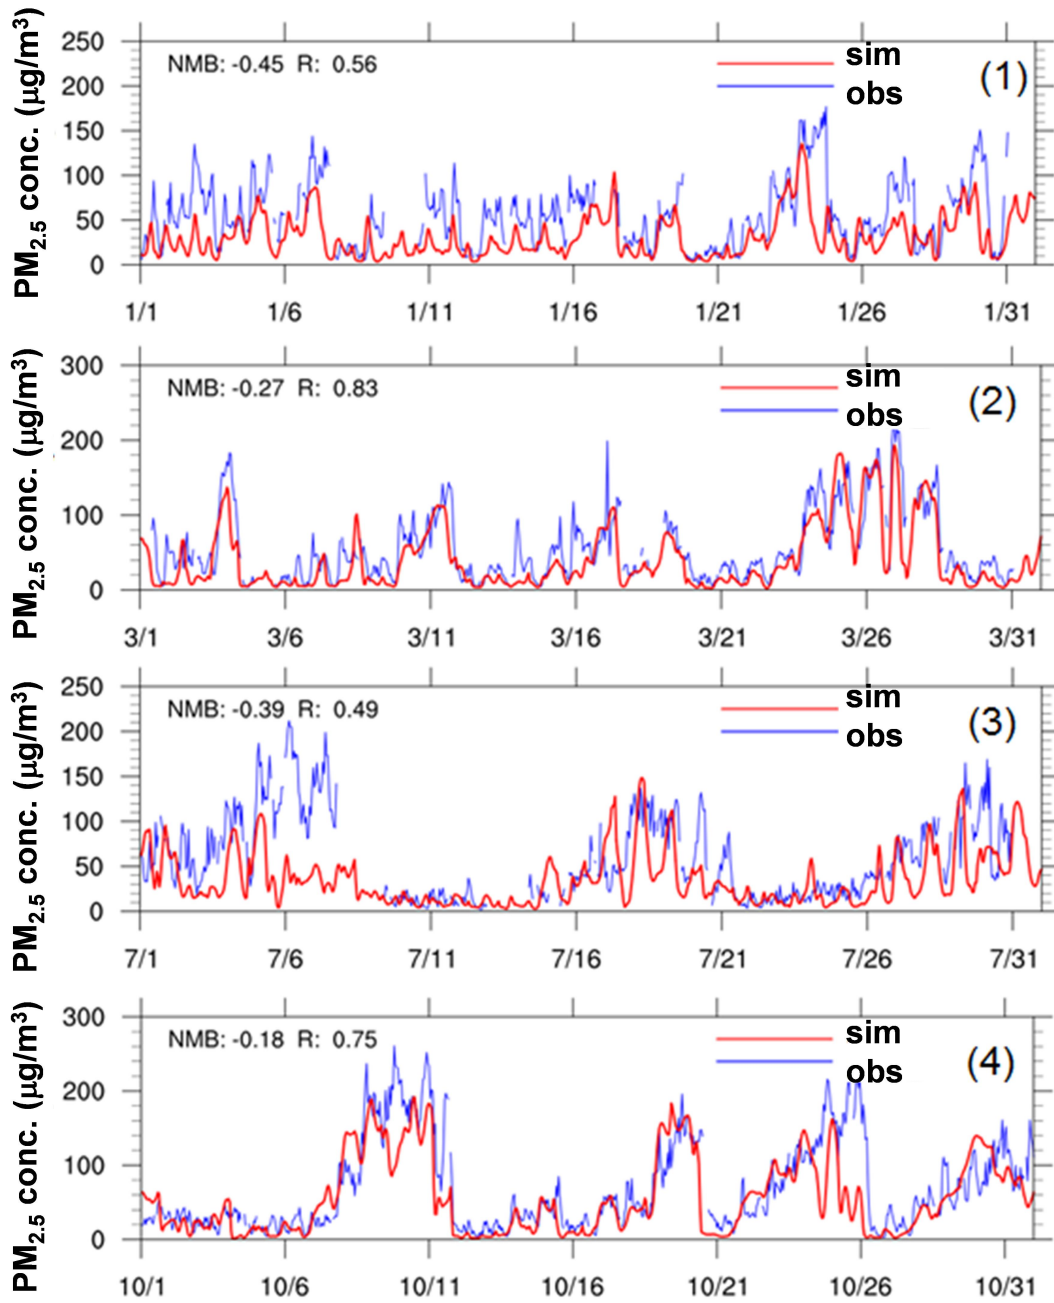

1

2 Figure S3. Comparison of simulated and observed PM<sub>2.5</sub> concentrations at the Chengde site in  
 3 Northern Hebei in (1) January, (2) March, (3) July, and (4) October.

4

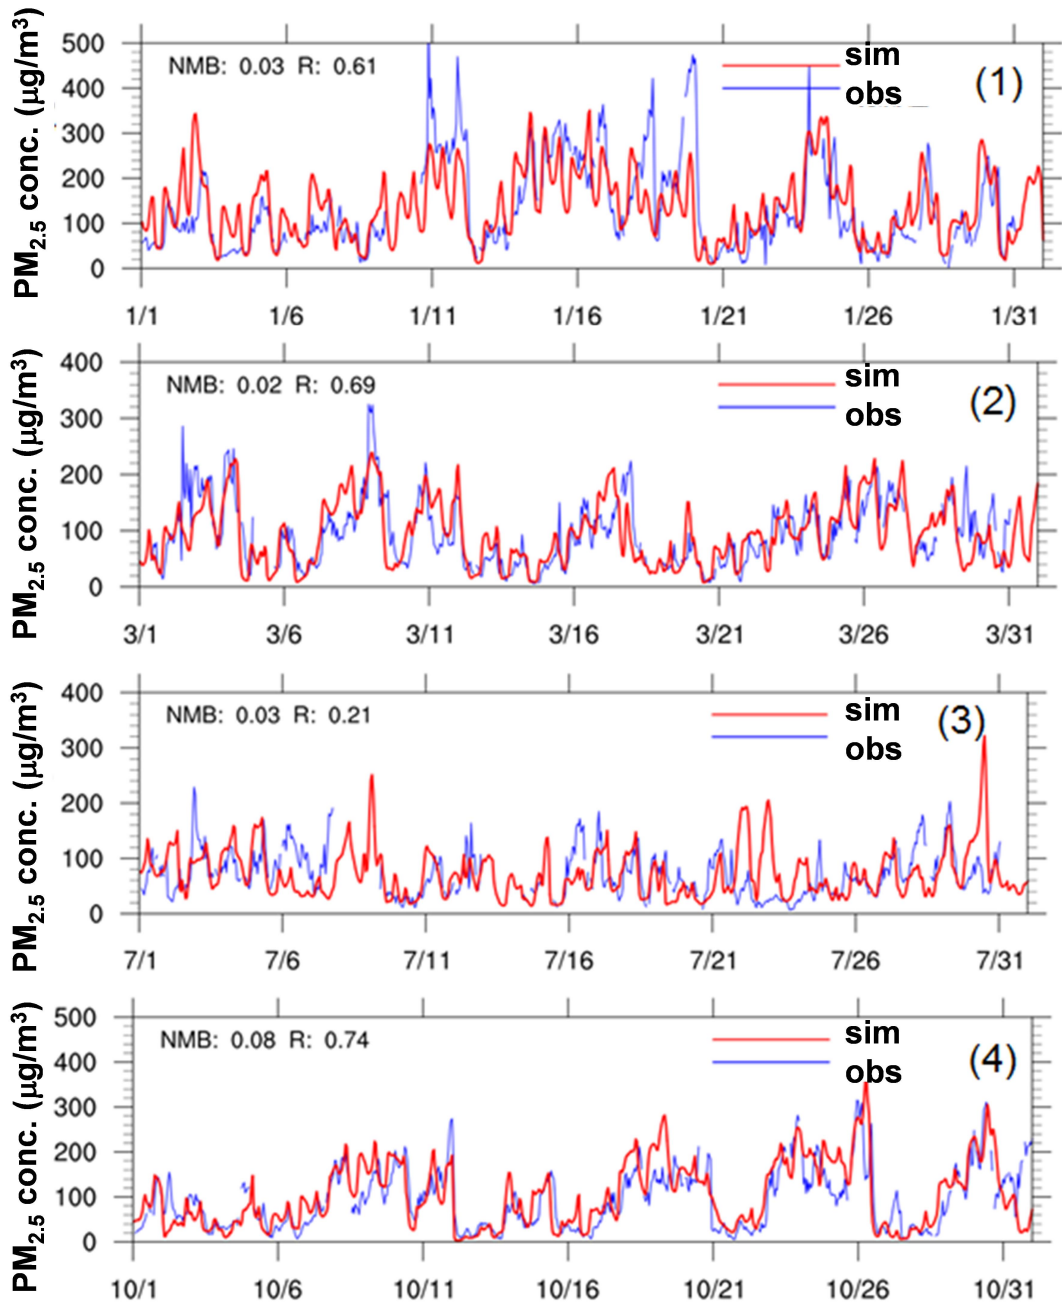

1  
 2 Figure S4. Comparison of simulated and observed PM<sub>2.5</sub> concentrations at the Cangzhou site  
 3 in Eastern Hebei in (1) January, (2) March, (3) July, and (4) October.  
 4



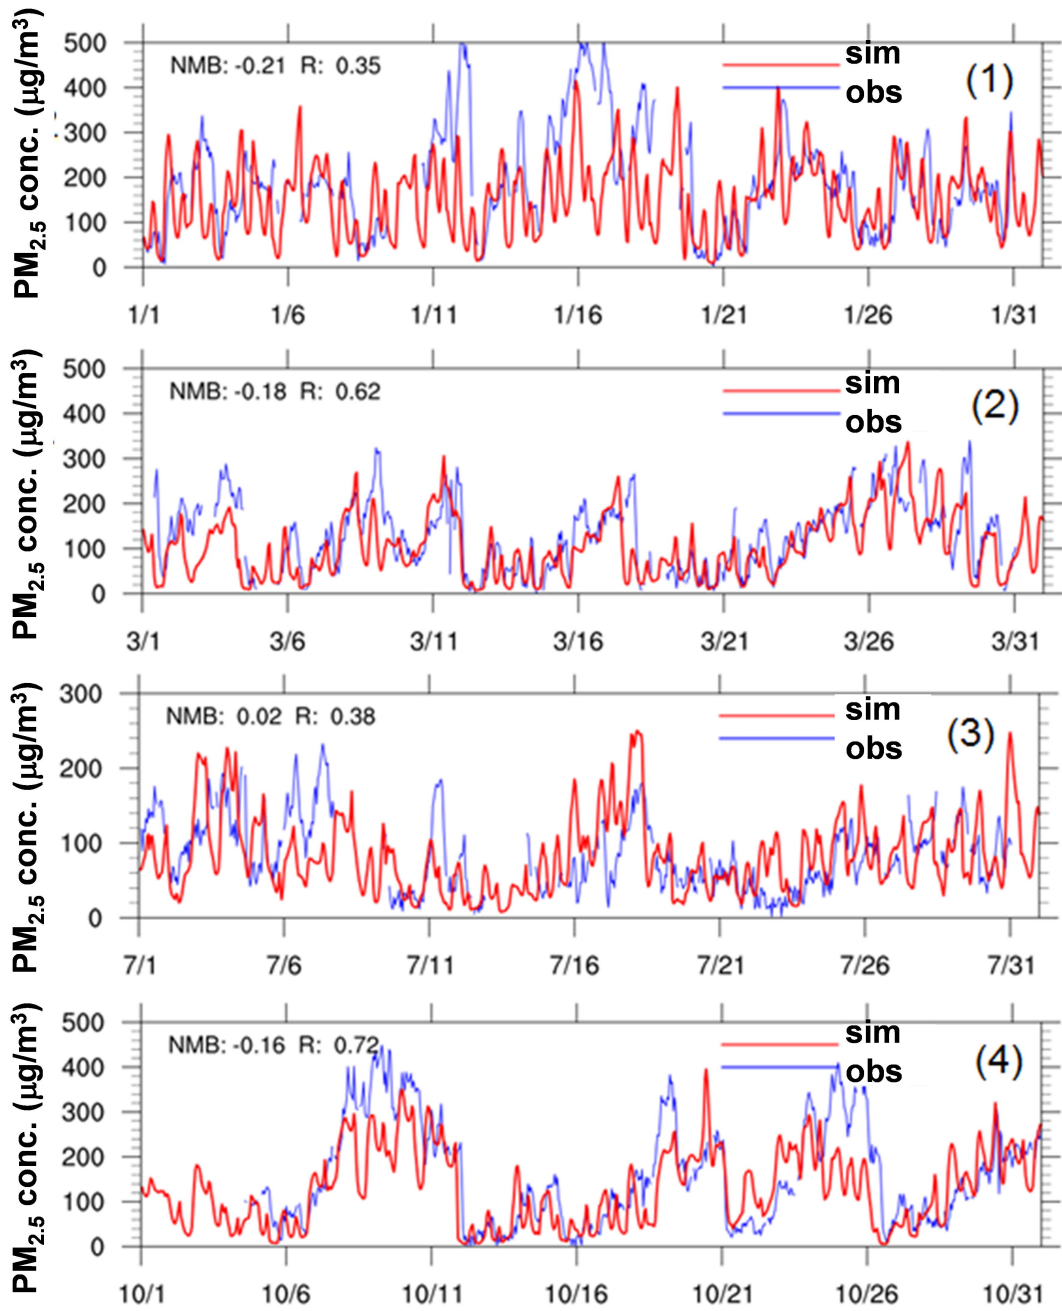

1

2 Figure S5. Comparison of simulated and observed PM<sub>2.5</sub> concentrations at the Baoding site in  
 3 Southern Hebei in (1) January, (2) March, (3) July, and (4) October.

4

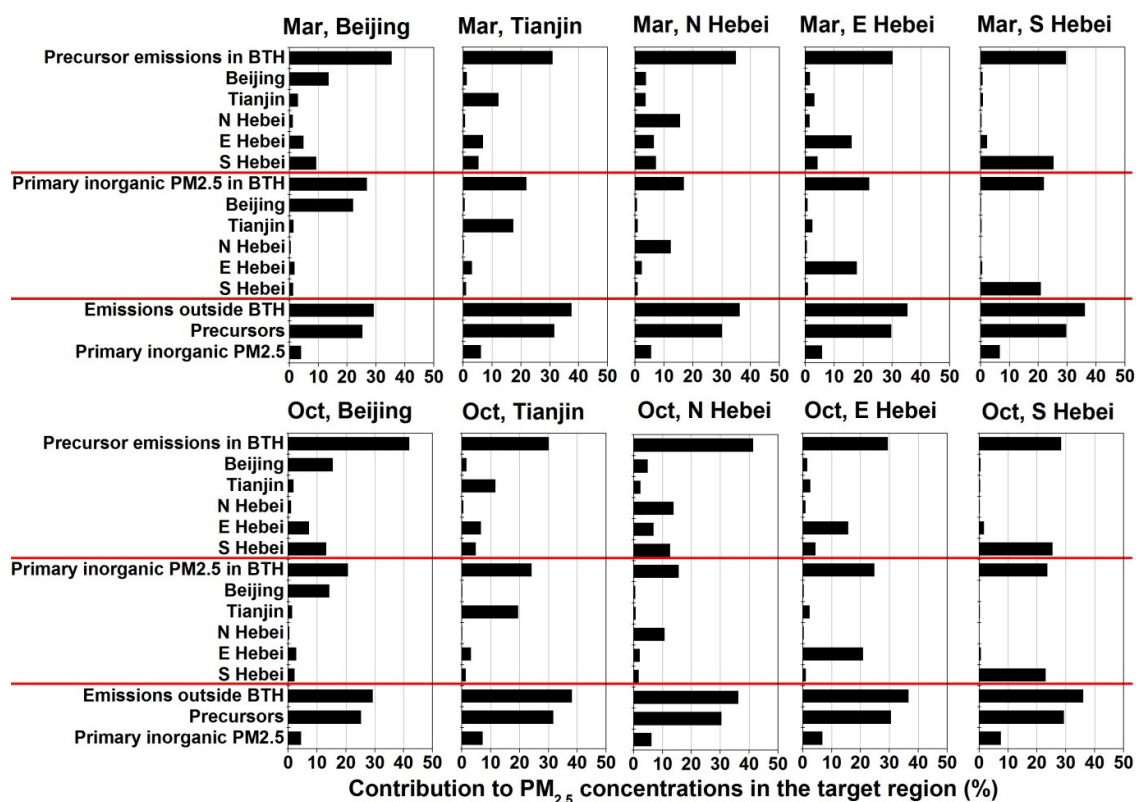

1  
 2 Figure S6. Contributions of precursor (NO<sub>x</sub>, SO<sub>2</sub>, NH<sub>3</sub>, NMVOC, IVOC, and POA) and  
 3 primary inorganic PM<sub>2.5</sub> emissions from individual regions to monthly mean PM<sub>2.5</sub>  
 4 concentrations in March and October. The contributions are quantified by comparing the base  
 5 case with sensitivity scenarios in which emissions from a specific source are reduced by 80%.  
 6 The results for January, July, and the 4-month mean are given in Fig. 6.  
 7

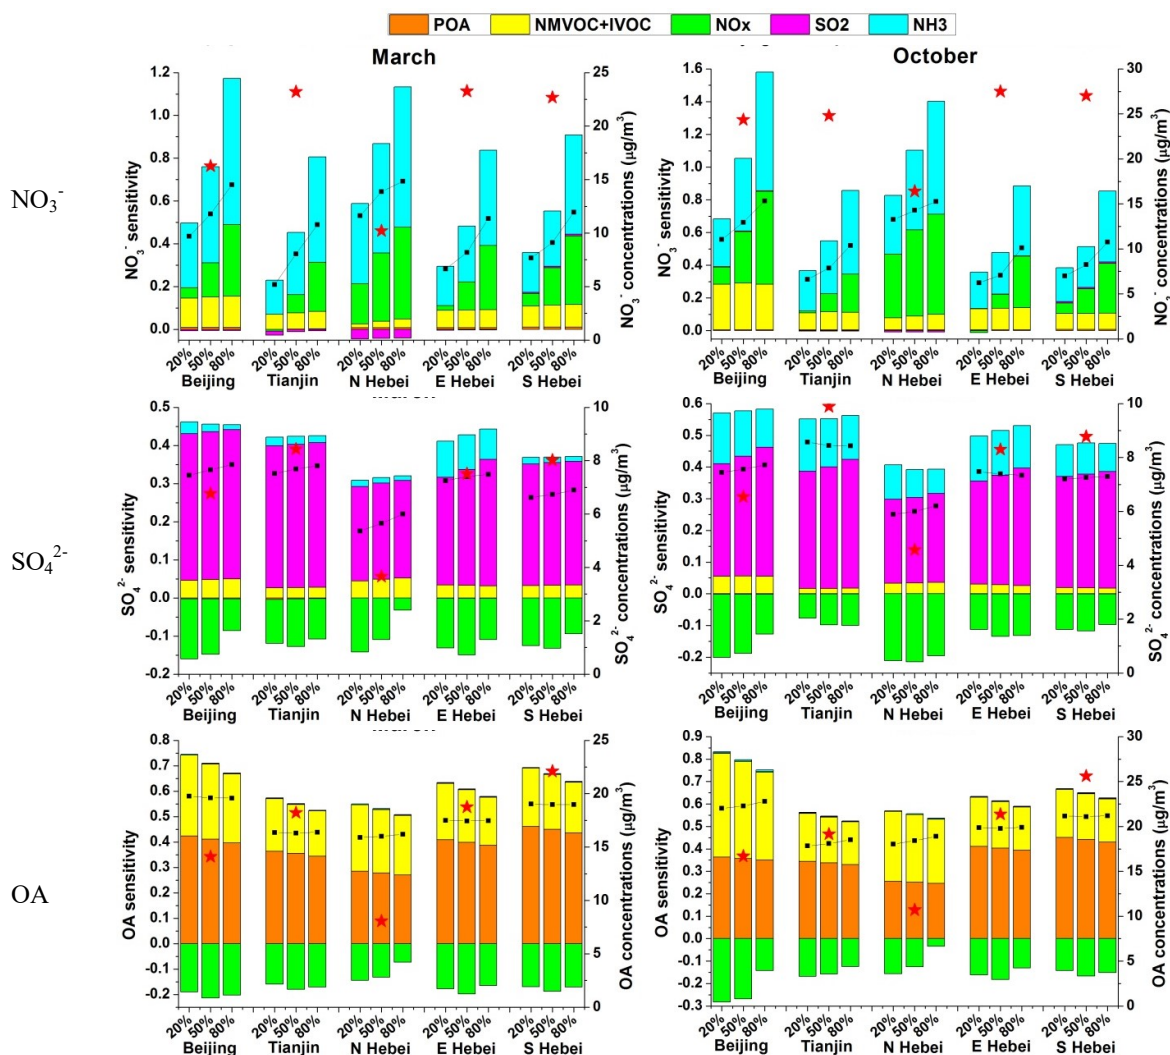

1 Figure S7. Sensitivity of monthly mean  $\text{NO}_3^-$ ,  $\text{SO}_4^{2-}$ , and OA concentrations to stepped  
 2 control of individual air pollutants in March and October. The meanings of X-axis, Y-axis,  
 3 coloured bars, black dotted lines, and red stars are the same as Fig. 4 but for  $\text{NO}_3^-/\text{SO}_4^{2-}/\text{OA}$ .  
 4 The results for January and July are given in Fig. 7.
